# Supplementary material for: Combining oximes with azides to create a novel 1-D [NaCoIII2] system: synthesis, structure and solid-state NMR
Source: Royal Society of Chemistry journal article supplement (doi:10.1039/b918082f), 2009-12-04
Supplement: b918082f.pdf [file b918082f.pdf]

## ELECTRONIC SUPPLEMENTARY INFORMATION

### Combining Oximes with Azides to Create a Novel 1-D [NaCo<sup>III</sup><sub>2</sub>] System: Synthesis, Structure and Solid-State NMR

Thushan Pathmalingam,<sup>a</sup> Fatemah Habib,<sup>a</sup> Cory M. Widdifield,<sup>a</sup> Francis Loiseau,<sup>a</sup> Tara J. Burchell,<sup>a</sup> Serge I. Gorelsky,<sup>b</sup> André M. Beauchemin,<sup>a,b</sup> David L. Bryce,<sup>\*a,b</sup> Muralee Murugesu<sup>\*a,b</sup>

<sup>a</sup>Department of Chemistry, University of Ottawa, 10 Marie-Curie, Ottawa, ON, K1N6N5, Canada.

<sup>b</sup>Centre for Catalysis Research and Innovation, 30 Marie-Curie, Ottawa, ON, K1N6N5, Canada.

E-mail: m.murugesu@uottawa.ca; dbryce@uottawa.ca; Tel: +1 613 562 5800-2733.

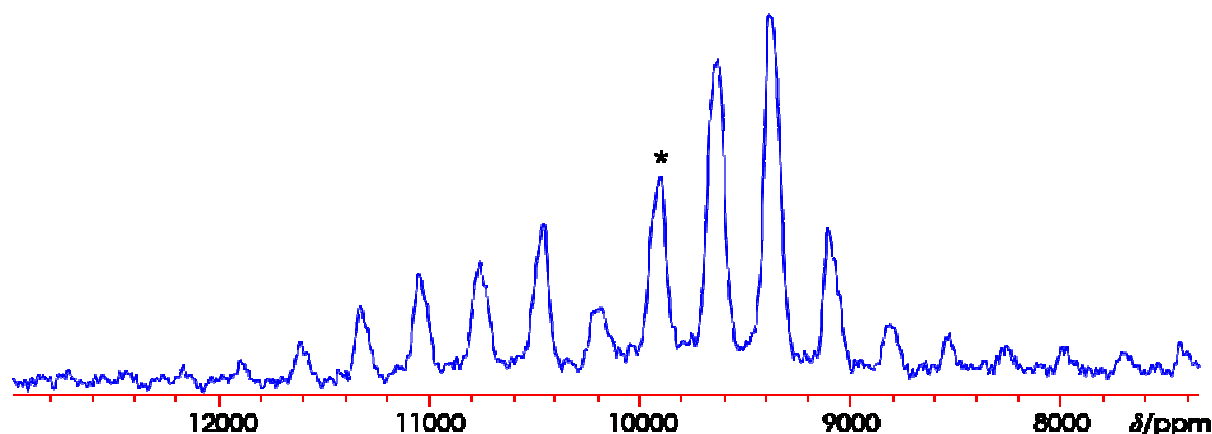

**Figure S1.** <sup>59</sup>Co MAS SSNMR spectrum of **1**, acquired at 21.1 T and  $\nu_{\text{MAS}} = 60$  kHz. The centreband is denoted with an asterisk. The experimental position of centre of gravity of the centreband is located at the position ( $\delta_{\text{cg}} = 9912(5)$  ppm) that would be expected using the  $C_Q(^{59}\text{Co})$ ,  $\eta_Q$ , and  $\delta_{\text{iso}}$  values quoted in the manuscript, after adjusting for the known second-order quadrupolar shift,  $\delta_Q$ , which is equal to  $-(1/392)(C_Q/\nu_0)^2(1+(\eta_Q)^2/3) = -60$  ppm. (i.e., the centre of gravity of the centreband,  $\delta_{\text{cg}}$ , is calculated to be located at  $\delta_{\text{iso}} + \delta_Q = 9975 - 60 = 9915$  ppm, in excellent agreement with observations).
